# Supplementary material for: Crystal phase and morphology engineering of ω-Li3V2O5nanospheres for high-rate lithium-ion capacitors
Source: Royal Society of Chemistry journal article supplement (doi:10.1039/d2ta07805h), 2022-11-21
Supplement: d2ta07805h1.pdf [file d2ta07805h1.pdf]

## Supporting Information

### Crystal Phase and Morphology Engineering of $\omega$ - $\text{Li}_3\text{V}_2\text{O}_5$ spheres for High-Rate Lithium-Ion Capacitors

*Zhengkong Ren, Shunzhi Yu, Tengyu Yao, Tiezhu Xu, Juhong He, Laifa Shen\**

Z. Ren, S. Yu, S. Wang, J. He, D. Wang, Y. Hu, W. Lian, T. Yao, L. Shen

Jiangsu Key Laboratory of Electrochemical Energy Storage Technologies, College of Material Science and Engineering, Nanjing University of Aeronautics and Astronautics

Nanjing 211106, P. R. China.

E-mail: [lfshen@nuaa.edu.cn](mailto:lfshen@nuaa.edu.cn)

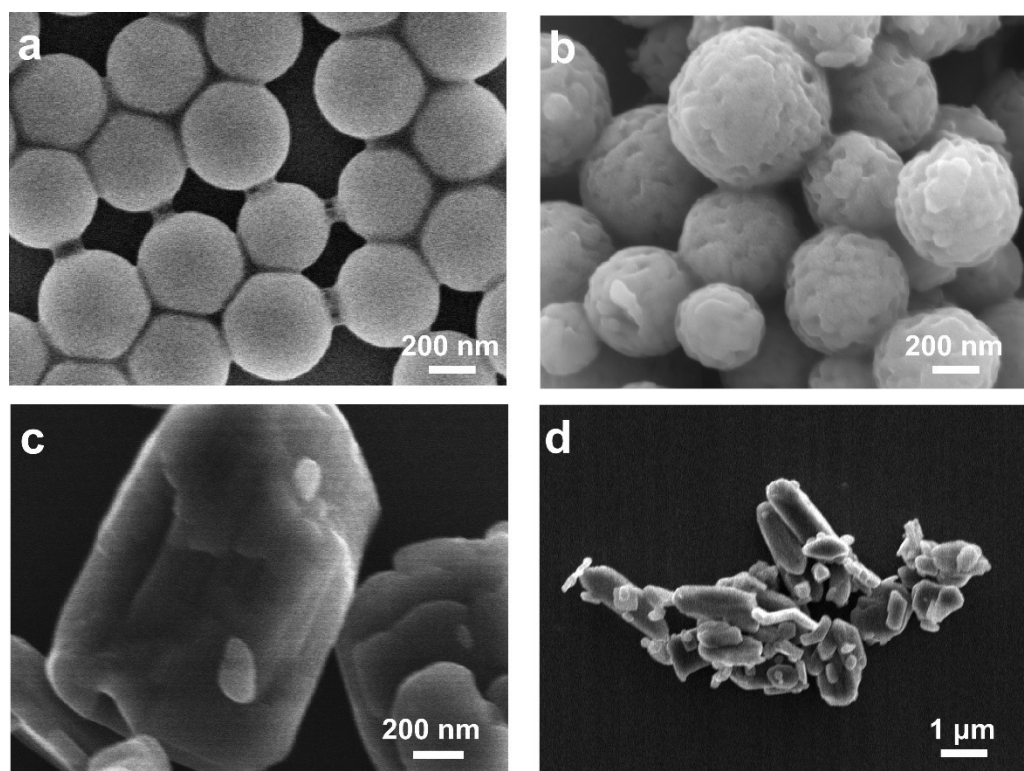

Figure S1. Supplementary figure of  $\text{V}_2\text{O}_5$  morphology. a) SEM image of V-glycerate spheres. b) SEM image of  $\text{V}_2\text{O}_5$  spheres. c-d) SEM image of  $\text{V}_2\text{O}_5$  bulk.

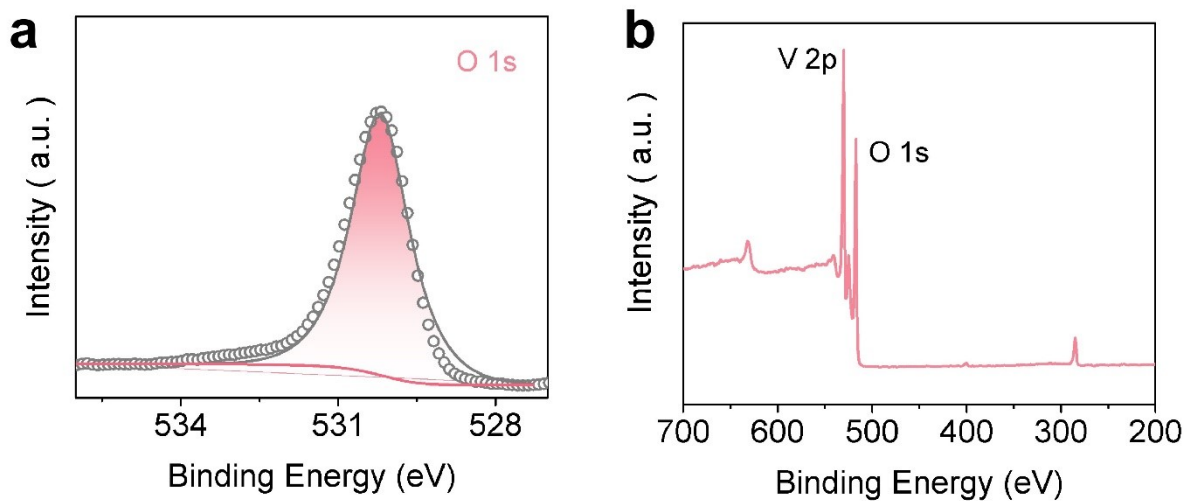

Figure S2. The XPS supplement spectrum of  $V_2O_5$ . a) The high-resolution XPS of O1s; b) The XPS full spectrum of  $V_2O_5$ .

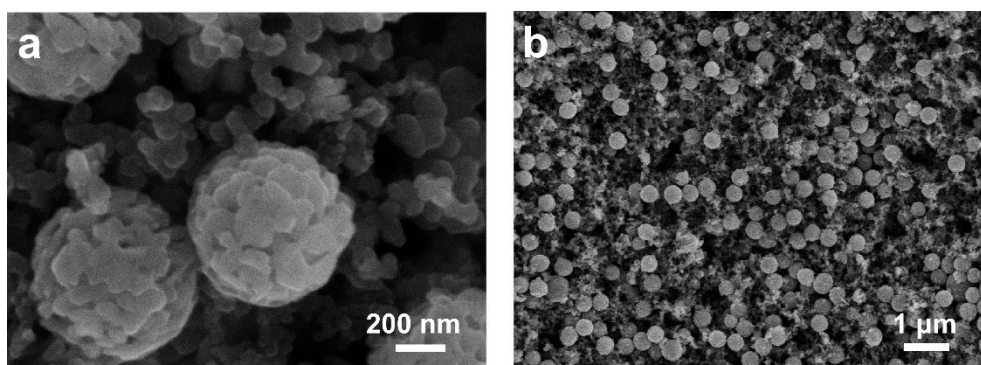

Figure S3. SEM image of  $Li_3V_2O_5$  nanospheres(LVO-NS) electrodes.

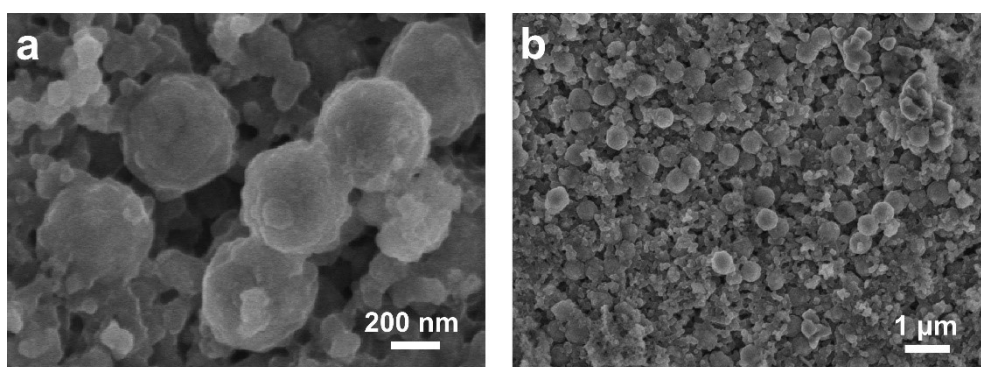

Figure S4. SEM image of  $Li_3V_2O_5$  nanospheres(LVO-NS) electrodes after 6000 cycles at  $10 A g^{-1}$ .

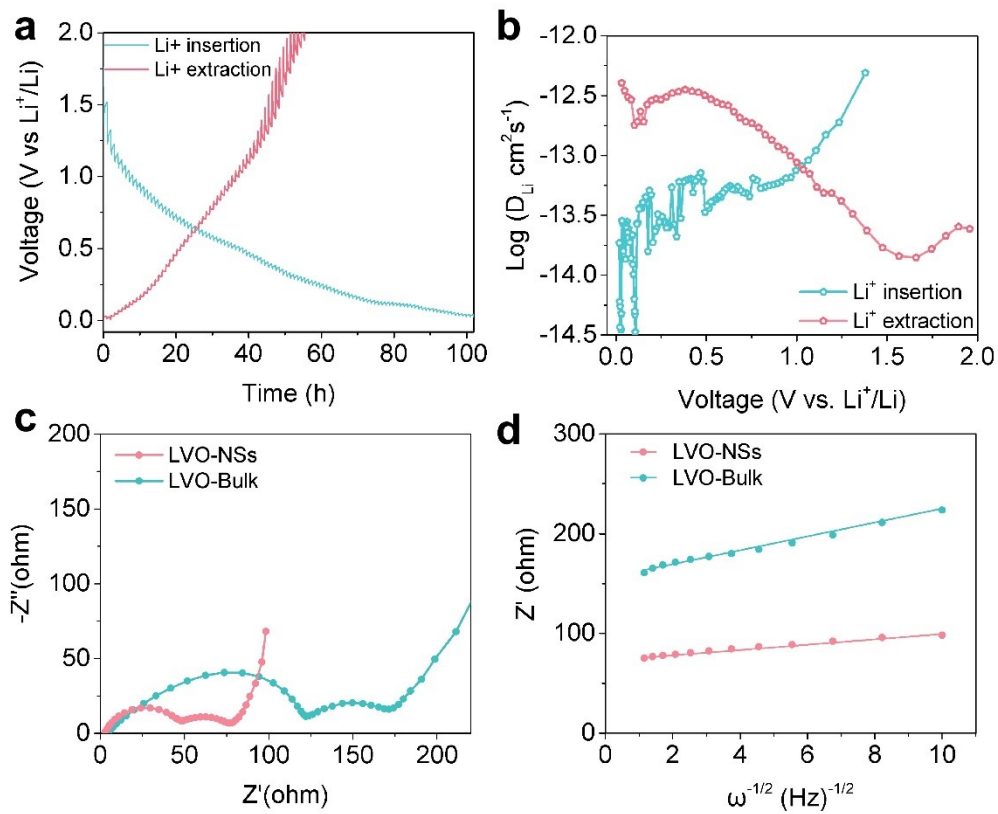

Figure S5 Kinetics analysis of the electrodes. a) GITT profiles of LVO bulk. b) Calculated  $D_{\text{Li}}$  values during charging and discharging. c) EIS profiles of LVO-NSs and LVO bulk electrodes. d) The slope determined by EIS data in Warburg region.

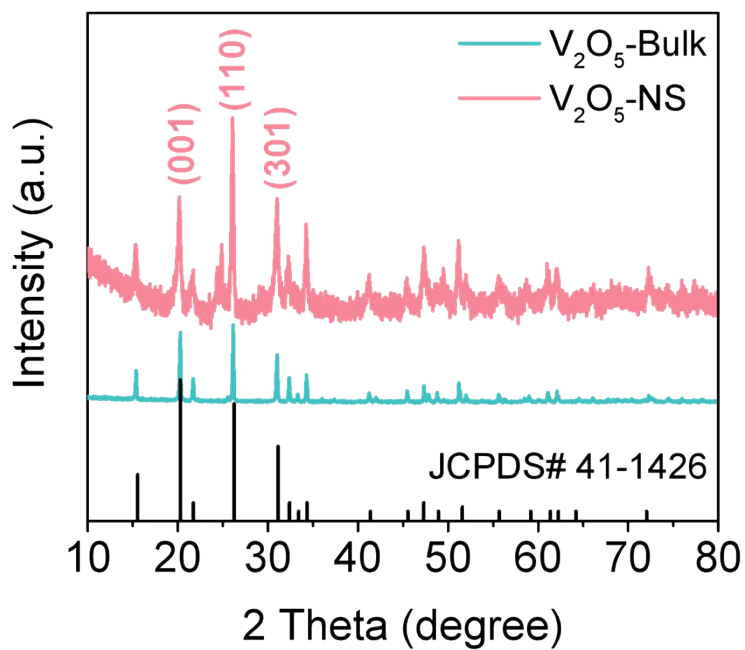

Figure S6 XRD pattern of  $\text{V}_2\text{O}_5$  spheres and  $\text{V}_2\text{O}_5$  bulk.

Table S2 The relative strength of different crystal planes.

| Planes                              | (001) | (110) | (301) |
|-------------------------------------|-------|-------|-------|
| V <sub>2</sub> O <sub>5</sub> -Bulk | 100   | 109.4 | 71.7  |
| V <sub>2</sub> O <sub>5</sub> -NS   | 100   | 136.8 | 99.3  |

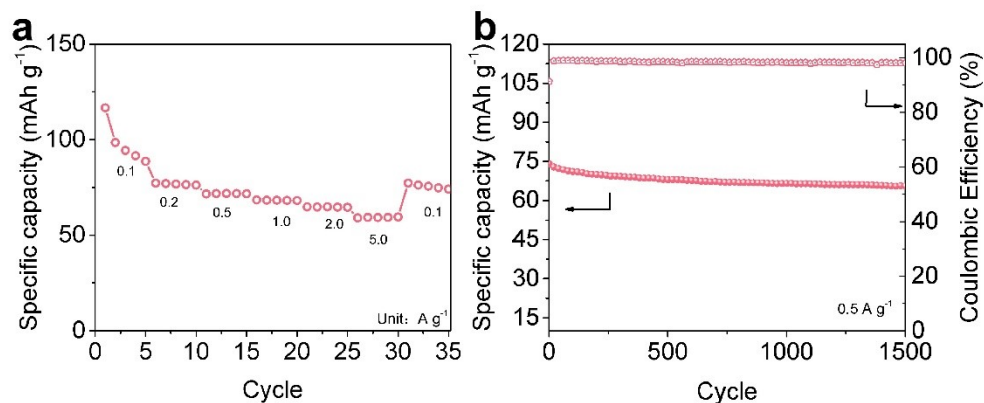

Figure S7 The evaluation of active carbon(AC). a) Rate performance comparison chart at various rates from 0.1 to 20 A g<sup>-1</sup>. b) Cycle performance and coulombic efficiency comparison chart at a current density of 0.5 A g<sup>-1</sup>.

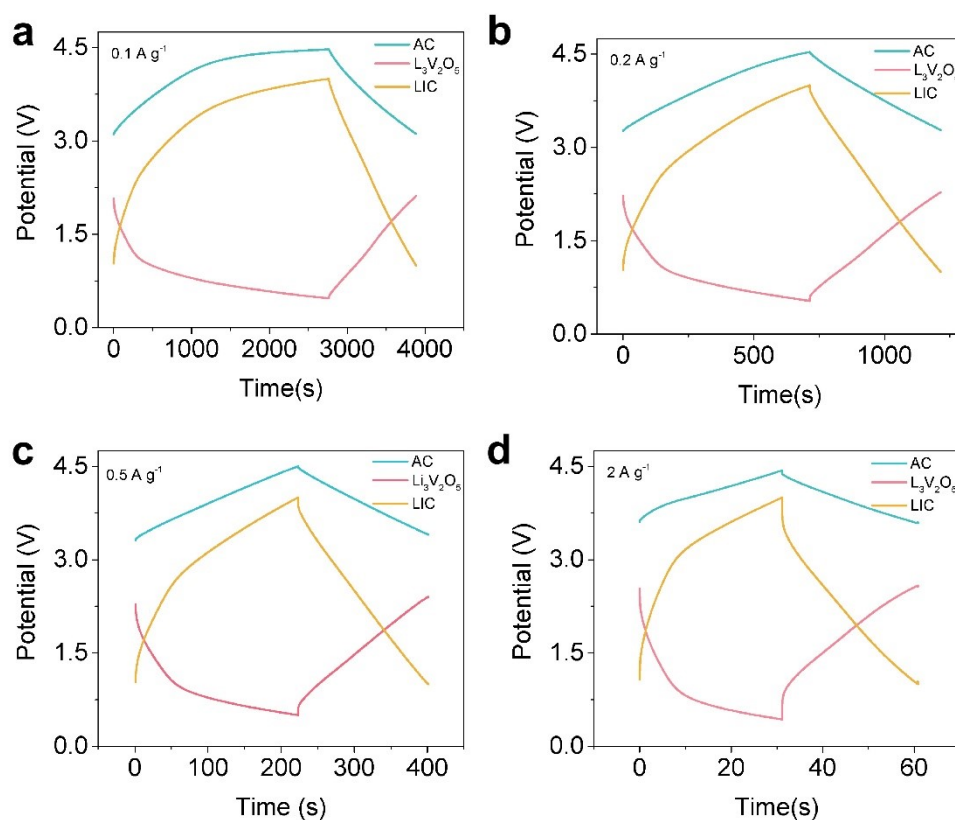

Figure S8. Galvanostatic charge/discharge curves of three-electrodes devices at different current density. a) 0.1 A g<sup>-1</sup>. b) 0.2 A g<sup>-1</sup>. c) 0.5 A g<sup>-1</sup>. d) 2.0 A g<sup>-1</sup>.

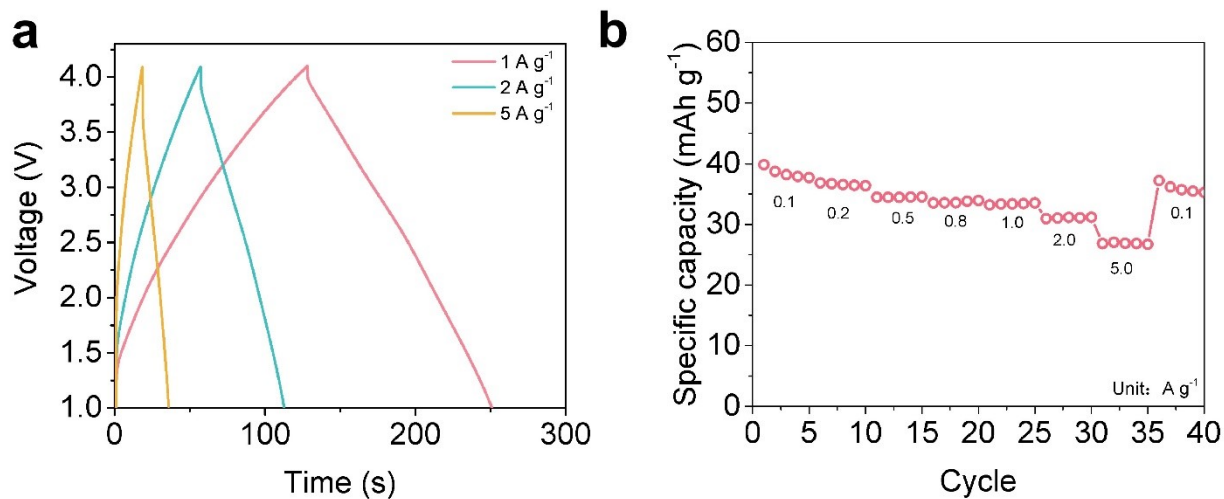

Figure S9. Supplement to the overall evaluation of LVO-NS//AC LIC. a) GCD curves at different current densities from 1 to 5.0 A g<sup>-1</sup>. b) Rate performance comparison chart of LIC at various rates from 0.1 to 20 A g<sup>-1</sup>.
